# Supplementary material for: Tools for assessing risk of reporting biases in studies and syntheses of studies: a systematic review
Source: PubMed Central journal article supplement — BMJ Open. 2018 Mar 14;8(3):e019703. doi: 10.1136/bmjopen-2017-019703 (PMC5857645; doi:10.1136/bmjopen-2017-019703), 2018-03-14
Supplement: bmjopen-2017-019703supp001.pdf [file bmjopen-2017-019703supp001.pdf]

**Table S1. Search strategies**

Database: Ovid MEDLINE(R) <1946 to 9 February 2017>

Search Strategy:

- 
- 1 ((tool or tools or instrument\$ or checklist\$ or check list\$ or scale or scales) and (quality or methodolog\$ or method or methods)).ti.
  - 2 (quality adj10 (score or scores or scoring or rating or rate) adj5 (methodolog\$ or method or methods)).tw.
  - 3 (guideline\$ and (quality or methodolog\$ or method or methods)).ti.
  - 4 ((assess\$ or apprais\$ or critical\$) adj3 (systematic review\$ or meta-analys\$ or metaanalys\$)).ti.
  - 5 ((score or scores or scoring or rating or rate) and (quality or methodolog\$ or method or methods)).ti.
  - 6 ((quality or methodology) adj3 (review or meta-analys\$ or metaanalys\$) adj3 (assess\$ or method\$)).tw.
  - 7 (quality adj3 article\$).tw.
  - 8 (critical\$ adj2 (apprais\$ or evaluat\$)).tw.
  - 9 ((apprais\$ or evaluat\$) adj3 (systematic review\$ or meta-analys\$ or metaanalys\$)).tw.
  - 10 (guideline\$ adj3 (systematic review\$ or meta-analys\$ or metaanalys\$)).tw.
  - 11 or/1-10
  - 12 Checklist/
  - 13 11 or 12
  - 14 Publication Bias/
  - 15 exp "bias (epidemiology)"/
  - 16 (bias adj3 (systematic review\$ or meta-analys\$ or metaanalys\$)).tw.
  - 17 ((quality or bias or methodolog\$) adj3 (systematic review\$ or meta-analys\$ or metaanalys\$)).tw.
  - 18 (bias\$ adj3 (publication\$ or disseminat\$ or language\$ or reporting or grey or gray or citation\$ or time delay or time lag or conference or abstract)).tw.
  - 19 or/14-18
  - 20 13 and 19

Database: Embase <1980 to 2017 Week 06>

Search Strategy:

- 
- 1 "Review Literature as Topic"/
  - 2 "meta analysis (topic)"/
  - 3 meta analysis/
  - 4 "systematic review (topic)"/
  - 5 systematic review/
  - 6 systematic review\$.tw.
  - 7 (meta-analys\$ or metaanalys\$).tw.
  - 8 or/1-7
  - 9 (bias adj3 (systematic review\$ or meta-analys\$ or metaanalys\$)).tw.
  - 10 ((quality or bias or methodolog\$) adj3 (systematic review\$ or meta-analys\$ or metaanalys\$)).tw.
  - 11 (bias\$ adj3 (publication\$ or disseminat\$ or language\$ or reporting or grey or gray or citation\$ or time delay or time lag or conference or abstract)).tw.

- 12 "internal validity"/
- 13 publishing/
- 14 or/9-13
- 15 ((tool or tools or instrument\$ or checklist\$ or check list\$ or scale or scales) and (quality or methodolog\$ or method or methods)).ti.
- 16 (quality adj10 (score or scores or scoring or rating or rate) adj5 (methodolog\$ or method or methods)).tw.
- 17 (guideline\$ and (quality or methodolog\$ or method or methods)).ti.
- 18 ((assess\$ or apprais\$ or critical\$) adj3 (systematic review\$ or meta-analys\$ or metaanalys\$)).ti.
- 19 ((score or scores or scoring or rating or rate) and (quality or methodolog\$ or method or methods)).ti.
- 20 ((quality or methodology) adj3 (review or meta-analys\$ or metaanalys\$) adj3 (assess\$ or method\$)).tw.
- 21 (quality adj3 article\$).tw.
- 22 (critical\$ adj2 (apprais\$ or evaluat\$)).tw.
- 23 ((apprais\$ or evaluat\$) adj3 (systematic review\$ or meta-analys\$ or metaanalys\$)).tw.
- 24 (guideline\$ adj3 (systematic review\$ or meta-analys\$ or metaanalys\$)).tw.
- 25 or/15-24
- 26 checklist/
- 27 25 or 26
- 28 8 and 14 and 27
- 29 limit 28 to embase

Database: PsycINFO <1806 to February Week 1 2017>

Search Strategy:

- 
- 1 meta-analysis/
  - 2 systematic review\$.tw.
  - 3 (meta-analys\$ or metaanalys\$).tw.
  - 4 or/1-3
  - 5 ((tool or tools or instrument\$ or checklist\$ or check list\$ or scale or scales) and (quality or methodolog\$ or method or methods)).ti.
  - 6 (quality adj10 (score or scores or scoring or rating or rate) adj5 (methodolog\$ or method or methods)).tw.
  - 7 (guideline\$ and (quality or methodolog\$ or method or methods)).ti.
  - 8 ((assess\$ or apprais\$ or critical\$) adj3 (systematic review\$ or meta-analys\$ or metaanalys\$)).ti.
  - 9 ((score or scores or scoring or rating or rate) and (quality or methodolog\$ or method or methods)).ti.
  - 10 ((quality or methodology) adj3 (review or meta-analys\$ or metaanalys\$) adj3 (assess\$ or method\$)).tw.
  - 11 (quality adj3 article\$).tw.
  - 12 (critical\$ adj2 (apprais\$ or evaluat\$)).tw.
  - 13 ((apprais\$ or evaluat\$) adj3 (systematic review\$ or meta-analys\$ or metaanalys\$)).tw.
  - 14 (guideline\$ adj3 (systematic review\$ or meta-analys\$ or metaanalys\$)).tw.
  - 15 checklist/
  - 16 or/5-15
  - 17 (bias adj3 (systematic review\$ or meta-analys\$ or metaanalys\$)).tw.

- 18 ((quality or bias or methodolog\$) adj3 (systematic review\$ or meta-analys\$ or metaanalys\$)).tw.
- 19 (bias\$ adj3 (publication\$ or disseminat\$ or language\$ or reporting or grey or gray or citation\$ or time delay or time lag or conference or abstract)).tw.
- 20 bias.mp.
- 21 or/17-20
- 22 4 and 16 and 21
