# Supplementary material for: Tools for assessing risk of reporting biases in studies and syntheses of studies: a systematic review
Source: PubMed Central journal article supplement — BMJ Open. 2018 Mar 14;8(3):e019703. doi: 10.1136/bmjopen-2017-019703 (PMC5857645; doi:10.1136/bmjopen-2017-019703), 2018-03-14
Supplement: bmjopen-2017-019703supp002.pdf [file bmjopen-2017-019703supp002.pdf]

**Table S2. Excluded studies**

| Reference                                                                                                                                                                                                                                                                                                                                               | Reason for exclusion                                               |
|---------------------------------------------------------------------------------------------------------------------------------------------------------------------------------------------------------------------------------------------------------------------------------------------------------------------------------------------------------|--------------------------------------------------------------------|
| Armijo-Olivo S, Cummings GG, Fuentes J, Saltaji H, Ha C, Chisholm A, et al. Identifying items to assess methodological quality in physical therapy trials: a factor analysis. <i>Physical Therapy</i> 2014;94(9):1272-84.                                                                                                                               | Paper does not report on a structured tool                         |
| Armijo-Olivo S, Fuentes J, Ospina M, Saltaji H, Hartling L. Inconsistency in the items included in tools used in general health research and physical therapy to evaluate the methodological quality of randomized controlled trials: a descriptive analysis. <i>BMC Medical Research Methodology</i> 2013;13:116.                                      | Systematic review of tools                                         |
| Armijo-Olivo S, Fuentes J, Rogers T, Hartling L, Saltaji H, Cummings GG. How should we evaluate the risk of bias of physical therapy trials?: a psychometric and meta-epidemiological approach towards developing guidelines for the design, conduct, and reporting of RCTs in Physical Therapy (PT) area: a study protocol. <i>Syst Rev</i> 2013;2:88. | Protocol for development of new tool                               |
| Aromataris E, Fernandez R, Godfrey CM, Holly C, Khalil H, Tungpunkom P. Summarizing systematic reviews: methodological development, conduct and reporting of an umbrella review approach. <i>International Journal of Evidence-Based Healthcare</i> 2015;13(3):132-40.                                                                                  | Refers to a tool to assess quality of published systematic reviews |
| Arrive L, Renard R, Carrat F, Belkacem A, Dahan H, Le Hir P, et al. A scale of methodological quality for clinical studies of radiologic examinations. <i>Radiology</i> 2000;217(1):69-74.                                                                                                                                                              | Tool does not assess reporting bias                                |
| Atakpo P, Vassar M. Publication bias in dermatology systematic reviews and meta-analyses. <i>Journal of Dermatological Science</i> 2016;82(2):69-74.                                                                                                                                                                                                    | Describes statistical methods only                                 |
| Ballard M, Montgomery P. Risk of bias in overviews of reviews: a scoping review of methodological guidance and four-item checklist. <i>Research Synthesis Methods</i> 2017;8(1):92-108.                                                                                                                                                                 | Refers to a tool to assess quality of published systematic reviews |
| Balzer K. Assessing the quality of research needs to go beyond scoring: Commentary on Crowe and Sheppard (2011). <i>International Journal of Nursing Studies</i> 2012;49(8):1048-50.                                                                                                                                                                    | Commentary                                                         |
| Bartlett WA, Braga F, Carobene A, Coskun A, Prusa R, Fernandez-Calle P, et al. A checklist for critical appraisal of studies of biological variation. <i>Clinical Chemistry and Laboratory Medicine</i> 2015;53(6):879-85.                                                                                                                              | Tool does not assess reporting bias                                |
| Bashir R, Dunn AG. Systematic review protocol assessing the processes for linking clinical trial registries and their published results. <i>BMJ Open</i> 2016;6(10):e013048.                                                                                                                                                                            | Paper does not report on a structured tool                         |
| Beck NB, Becker RA, Boobis A, Fergusson D, Fowle JR, Goodman J, et al. Instruments for assessing risk of bias and other methodological criteria of animal studies: omission of well-established methods. <i>Environmental Health Perspectives</i> 2014;122(3):A66-7.                                                                                    | Commentary                                                         |

| Reference                                                                                                                                                                                                                                            | Reason for exclusion                                               |
|------------------------------------------------------------------------------------------------------------------------------------------------------------------------------------------------------------------------------------------------------|--------------------------------------------------------------------|
| Berkman ND, Lohr KN, Morgan LC, Kuo T-M, Morton SC. Interrater reliability of grading strength of evidence varies with the complexity of the evidence in systematic reviews. <i>Journal of Clinical Epidemiology</i> 2013;66(10):1105-17.e1.         | Tool does not assess reporting bias                                |
| Burda BU, Holmer HK, Norris SL. Limitations of A Measurement Tool to Assess Systematic Reviews (AMSTAR) and suggestions for improvement. <i>Systematic Reviews</i> 2016;5:58.                                                                        | Refers to a tool to assess quality of published systematic reviews |
| Cartes-Velasquez RA, Manterola C, Aravena P, Moraga J. Reliability and validity of MINCIR scale for methodological quality in dental therapy research. <i>Brazilian Oral Research</i> 2014;28.                                                       | Tool does not assess reporting bias                                |
| Chaimani A, Salanti G. Using network meta-analysis to evaluate the existence of small-study effects in a network of interventions. <i>Research Synthesis Methods</i> 2012;3(2):161-76.                                                               | Describes statistical methods only                                 |
| da Costa BR, Hilfiker R, Egger M. PEDro's bias: summary quality scores should not be used in meta-analysis. <i>Journal of Clinical Epidemiology</i> 2013;66(1):75-7.                                                                                 | Commentary                                                         |
| Dahm P. Raising the bar for systematic reviews with Assessment of Multiple Systematic Reviews (AMSTAR). <i>BJU International</i> 2017;119(2):193.                                                                                                    | Refers to a tool to assess quality of published systematic reviews |
| Dalton DR, Aguinis H, Dalton CM, Bosco FA, Pierce CA. Revisiting the file drawer problem in meta-analysis: An assessment of published and nonpublished correlation matrices. <i>Personnel Psychology</i> 2012;65(2):221-49.                          | Paper does not report on a structured tool                         |
| David SP, Ware JJ, Chu IM, Loftus PD, Fusar-Poli P, Radua J, et al. Potential reporting bias in fMRI studies of the brain. <i>PloS One</i> 2013;8(7):e70104.                                                                                         | Paper does not report on a structured tool                         |
| Davino-Ramaya C, Krause LK, Robbins CW, Harris JS, Koster M, Chan W, et al. Transparency matters: Kaiser Permanente's National Guideline Program methodological processes. <i>The Permanente Journal</i> 2012;16(1):55-62.                           | Refers to a tool to assess quality of published systematic reviews |
| Dawson A, Raphael KG, Glaros A, Axelsson S, Arima T, Ernberg M, et al. Development of a quality-assessment tool for experimental bruxism studies: reliability and validity. <i>Journal of Orofacial Pain</i> 2013;27(2):111-22.                      | Tool does not assess reporting bias                                |
| Deshpande S, Misso K, Westwood M, Stirk L, De Kock S, Clayton D, et al. Not all cochrane reviews are good quality systematic reviews. <i>Value in Health</i> 2016;19(7):A371.                                                                        | Refers to a tool to assess quality of published systematic reviews |
| Disher T, Benoit B, Johnston C, Campbell-Yeo M. Skin-to-skin contact for procedural pain in neonates: acceptability of novel systematic review synthesis methods and GRADEing of the evidence. <i>Journal of Advanced Nursing</i> 2017;73(2):504-19. | Paper does not report on a structured tool                         |
| Dreier M, Borutta B, Stahmeyer J, Krauth C, Walter U. Comparison of tools for assessing the methodological quality of primary and                                                                                                                    | Systematic review of tools                                         |

| Reference                                                                                                                                                                                                                                                                            | Reason for exclusion                                                          |
|--------------------------------------------------------------------------------------------------------------------------------------------------------------------------------------------------------------------------------------------------------------------------------------|-------------------------------------------------------------------------------|
| secondary studies in health technology assessment reports in Germany. <i>GMS Health Technology Assessment</i> 2010;6.                                                                                                                                                                |                                                                               |
| Dreyer N, Velentgas P, Duddy A, Westrich KD, Dubois RW. Grace checklist: Rating the strength of evidence for observational studies of comparative effectiveness. <i>Value in Health</i> 2012;15(4):A5.                                                                               | Tool does not assess reporting bias                                           |
| Dreyer NA, Velentgas P, Westrich K, Dubois R. The GRACE checklist for rating the quality of observational studies of comparative effectiveness: a tale of hope and caution. <i>Journal of Managed Care &amp; Specialty Pharmacy</i> 2014;20(3):301-8.                                | Tool does not assess reporting bias                                           |
| Dreyer NA, Velentgas P, Westrich K, Dubois RW. GRACE: A validated checklist for identifying robust observational studies of comparative effectiveness. <i>Pharmacoepidemiol Drug Saf</i> 2013;22:356.                                                                                | Tool does not assess reporting bias                                           |
| Dreyer NA, Velentgas P, Westrich KD, Dubois RW. There but for grace? a validated screening tool for quality observational studies of comparative effectiveness. <i>Value in Health</i> 2013;16(3):A21.                                                                               | Tool does not assess reporting bias                                           |
| Drucker AM, Fleming P, Chan A-W. Research Techniques Made Simple: Assessing Risk of Bias in Systematic Reviews. <i>The Journal of Investigative Dermatology</i> 2016;136(11):e109-e14.                                                                                               | Guidance on using existing tools                                              |
| Dwan K, Altman DG, Clarke M, Gamble C, Higgins JP, Sterne JA, et al. Evidence for the selective reporting of analyses and discrepancies in clinical trials: a systematic review of cohort studies of clinical trials. <i>PLoS Med</i> 2014;11(6):e1001666.                           | Paper does not report on a structured tool                                    |
| Dwan K, Gamble C, Williamson PR, Kirkham JJ. Systematic review of the empirical evidence of study publication bias and outcome reporting bias - an updated review. <i>PLoS One</i> 2013;8(7):e66844.                                                                                 | Paper does not report on a structured tool                                    |
| Dwan K, Kirkham JJ, Williamson PR, Gamble C. Selective reporting of outcomes in randomised controlled trials in systematic reviews of cystic fibrosis. <i>BMJ Open</i> 2013;3(6).                                                                                                    | Evaluation of use of tool in practice, but no measurement properties assessed |
| Fantony JJ, Gopalakrishna A, Noord MV, Inman BA. Reporting Bias Leading to Discordant Venous Thromboembolism Rates in the United States Versus Non-US Countries Following Radical Cystectomy: A Systematic Review and Meta-analysis. <i>European Urology Focus</i> 2016;2(2):189-96. | Paper does not report on a structured tool                                    |
| Fitzgerald A, Coop C. Validation and modification of the Graphical Appraisal Tool for Epidemiology (GATE) for appraising systematic reviews in evidence-based guideline development. <i>Health Outcomes Research in Medicine</i> 2011;2(1):e51-e9.                                   | Refers to a tool to assess quality of published systematic reviews            |
| Frosi G, Riley RD, Williamson PR, Kirkham JJ. Multivariate meta-analysis helps examine the impact of outcome reporting bias in Cochrane rheumatoid arthritis reviews. <i>J Clin Epidemiol</i> 2015;68(5):542-50.                                                                     | Evaluation of use of tool in practice, but no measurement properties assessed |
| Furukawa TA, Miura T, Chaimani A, Leucht S, Cipriani A, Noma H, et al. Using the contribution matrix to evaluate complex study                                                                                                                                                       | Describes statistical methods only                                            |

| Reference                                                                                                                                                                                                                                                                          | Reason for exclusion                                               |
|------------------------------------------------------------------------------------------------------------------------------------------------------------------------------------------------------------------------------------------------------------------------------------|--------------------------------------------------------------------|
| limitations in a network meta-analysis: a case study of bipolar maintenance pharmacotherapy review. BMC Res Notes 2016;9:218.                                                                                                                                                      |                                                                    |
| Ghogomu EAT, Maxwell LJ, Buchbinder R, Rader T, Pardo Pardo J, Johnston RV, et al. Updated method guidelines for cochrane musculoskeletal group systematic reviews and metaanalyses. The Journal of Rheumatology 2014;41(2):194-205.                                               | Guidance on using existing tools                                   |
| Golder S, Loke YK, Bland M. Unpublished data can be of value in systematic reviews of adverse effects: methodological overview. Journal of Clinical Epidemiology 2010;63(10):1071-81.                                                                                              | Paper does not report on a structured tool                         |
| Golder S, Loke YK. Is there evidence for biased reporting of published adverse effects data in pharmaceutical industry-funded studies? British Journal of Clinical Pharmacology 2008;66(6):767-73.                                                                                 | Paper does not report on a structured tool                         |
| Goodyear-Smith FA, van Driel ML, Arroll B, Del Mar C. Analysis of decisions made in meta-analyses of depression screening and the risk of confirmation bias: a case study. BMC Med Res Methodol 2012;12:76.                                                                        | Paper does not report on a structured tool                         |
| Grant S, Pedersen ER, Osilla KC, Kulesza M, D'Amico EJ. It is time to develop appropriate tools for assessing minimal clinically important differences, performance bias and quality of evidence in reviews of behavioral interventions. Addiction 2016;111(9):1533-5.             | Paper does not report on a structured tool                         |
| Greenland S, O'Rourke K. On the bias produced by quality scores in meta-analysis, and a hierarchical view of proposed solutions. Biostatistics (Oxford, England) 2001;2(4):463-71.                                                                                                 | Describes statistical methods only                                 |
| Haddaway NR, Woodcock P, Macura B, Collins A. Making literature reviews more reliable through application of lessons from systematic reviews. Conservation Biology 2015;29(6):1596-605.                                                                                            | Guidance on using existing tools                                   |
| Hahn S, Williamson PR, Hutton JL, Garner P, Flynn EV. Assessing the potential for bias in meta-analysis due to selective reporting of subgroup analyses within studies. Statistics in Medicine 2000;19(24):3325-36.                                                                | Describes statistical methods only                                 |
| Heck NC, Mirabito LA, LeMaire K, Livingston NA, Flentje A. Omitted data in randomized controlled trials for anxiety and depression: A systematic review of the inclusion of sexual orientation and gender identity. Journal of Consulting and Clinical Psychology 2017;85(1):72-6. | Paper does not report on a structured tool                         |
| Higgins JPT, Lane PW, Anagnostelis B, Anzures-Cabrera J, Baker NF, Cappelleri JC, et al. A tool to assess the quality of a meta-analysis. Research Synthesis Methods 2013;4(4):351-66.                                                                                             | Refers to a tool to assess quality of published systematic reviews |
| Hoy D, Brooks P, Woolf A, Blyth F, March L, Bain C, et al. Assessing risk of bias in prevalence studies: modification of an existing tool and evidence of interrater agreement. J Clin Epidemiol 2012;65(9):934-9.                                                                 | Tool does not assess reporting bias                                |
| Hsu W, Speier W, Taira RK. Automated extraction of reported statistical analyses: towards a logical representation of clinical trial                                                                                                                                               | Paper does not report on a structured tool                         |

| Reference                                                                                                                                                                                                                                                                                            | Reason for exclusion                                                          |
|------------------------------------------------------------------------------------------------------------------------------------------------------------------------------------------------------------------------------------------------------------------------------------------------------|-------------------------------------------------------------------------------|
| literature. AMIA Annual Symposium proceedings AMIA Symposium 2012;2012:350-9.                                                                                                                                                                                                                        |                                                                               |
| Ioannidis JPA, Munafo MR, Fusar-Poli P, Nosek BA, David SP. Publication and other reporting biases in cognitive sciences: detection, prevalence, and prevention. Trends in Cognitive Sciences 2014;18(5):235-41.                                                                                     | Paper does not report on a structured tool                                    |
| Ioannidis JPA, Trikalinos TA. An exploratory test for an excess of significant findings. Clinical Trials 2007;4(3):245-53.                                                                                                                                                                           | Describes statistical methods only                                            |
| Ioannidis JPA, Trikalinos TA. The appropriateness of asymmetry tests for publication bias in meta-analyses: a large survey. CMAJ 2007;176(8):1091-6.                                                                                                                                                 | Describes statistical methods only                                            |
| Jarde A, Losilla J-M, Vives J, Rodrigo MF. Q-Coh: A tool to screen the methodological quality of cohort studies in systematic reviews and meta-analysis. International Journal of Clinical and Health Psychology 2013;13(2):138-46.                                                                  | Tool does not assess reporting bias                                           |
| Jefferson T, Jones MA, Doshi P, Del Mar CB, Hama R, Thompson MJ, et al. Risk of bias in industry-funded oseltamivir trials: comparison of core reports versus full clinical study reports. BMJ Open 2014;4(9):e005253.                                                                               | Evaluation of use of tool in practice, but no measurement properties assessed |
| Johnson BT, Low RE, MacDonald HV. Panning for the gold in health research: incorporating studies' methodological quality in meta-analysis. Psychology & Health 2015;30(1):135-52.                                                                                                                    | Describes statistical methods only                                            |
| Johnston BC, Patrick DL, Busse JW, Schunemann HJ, Agarwal A, Guyatt GH. Patient-reported outcomes in meta-analyses--Part 1: assessing risk of bias and combining outcomes. Health and Quality of Life Outcomes 2013;11:109.                                                                          | Guidance on using existing tools                                              |
| Jorgensen L, Paludan-Muller AS, Laursen DR, Savovic J, Boutron I, Sterne JA, et al. Evaluation of the Cochrane tool for assessing risk of bias in randomized clinical trials: overview of published comments and analysis of user practice in Cochrane and non-Cochrane reviews. Syst Rev 2016;5:80. | Evaluation of use of tool in practice, but no measurement properties assessed |
| Jurgens T, Whelan AM, MacDonald M, Lord L. Development and evaluation of an instrument for the critical appraisal of randomized controlled trials of natural products. BMC Complement Altern Med 2009;9:11.                                                                                          | Tool does not assess reporting bias                                           |
| Jurgens TM, Whelan AM. Development and evaluation of an instrument for the critical appraisal of randomized controlled trials of natural products. Canadian Journal of Hospital Pharmacy 2011;64(1):68.                                                                                              | Tool does not assess reporting bias                                           |
| Katikireddi SV, Egan M, Petticrew M. How do systematic reviews incorporate risk of bias assessments into the synthesis of evidence? A methodological study. Journal of Epidemiology and Community Health 2015;69(2):189-95.                                                                          | Audit of tools used in systematic reviews                                     |

| Reference                                                                                                                                                                                                                                                   | Reason for exclusion                                                          |
|-------------------------------------------------------------------------------------------------------------------------------------------------------------------------------------------------------------------------------------------------------------|-------------------------------------------------------------------------------|
| Katrak P, Bialocerkowski AE, Massy-Westropp N, Kumar S, Grimmer KA. A systematic review of the content of critical appraisal tools. <i>BMC Med Res Methodol</i> 2004;4:22.                                                                                  | Systematic review of tools                                                    |
| Kirkham JJ, Riley RD, Williamson PR. A multivariate meta-analysis approach for reducing the impact of outcome reporting bias in systematic reviews. <i>Statistics in Medicine</i> 2012;31(20):2179-95.                                                      | Describes statistical methods only                                            |
| Kocsis JH, Gerber AJ, Milrod B, Roose SP, Barber J, Thase ME, et al. A new scale for assessing the quality of randomized clinical trials of psychotherapy. <i>Comprehensive Psychiatry</i> 2010;51(3):319-24.                                               | Tool does not assess reporting bias                                           |
| Kovacs FM, Abaira V. Language Bias in a Systematic Review of Chronic Pain: How to Prevent the Omission of Non-English Publications? <i>The Clinical Journal of Pain</i> 2004;20(3):199-200.                                                                 | Paper does not report on a structured tool                                    |
| Krauth D, Woodruff TJ, Bero L. Instruments for assessing risk of bias and other methodological criteria of published animal studies: a systematic review. <i>Environmental Health Perspectives</i> 2013;121(9):985-92.                                      | Systematic review of tools                                                    |
| Kromrey JD, Rendina-Gobioff G. On Knowing What We Do Not Know: An Empirical Comparison of Methods to Detect Publication Bias in Meta-Analysis. <i>Educational and Psychological Measurement</i> 2006;66(3):357-73.                                          | Describes statistical methods only                                            |
| Lamont RF. A quality assessment tool to evaluate tocolytic studies. <i>BJOG</i> 2006;113(Suppl 3):96-9.                                                                                                                                                     | Tool does not assess reporting bias                                           |
| Langendam M, Carrasco-Labra A, Santesso N, Mustafa RA, Brignardello-Petersen R, Ventresca M, et al. Improving GRADE evidence tables part 2: A systematic survey of explanatory notes shows more guidance is needed. <i>J Clin Epidemiol</i> 2016;74:19-27.  | Evaluation of use of tool in practice, but no measurement properties assessed |
| Liebherz S, Schmidt N, Rabung S. How to assess the quality of psychotherapy outcome studies: A systematic review of quality assessment criteria. <i>Psychotherapy Research</i> 2016;26(5):573-89.                                                           | Systematic review of tools                                                    |
| Liebherz S, Schmidt N, Rabung S. Study Quality and its Influence on Treatment Outcome in Studies on the Effectiveness of Inpatient Psychotherapy - A Meta-Analysis. <i>PPmP Psychotherapie Psychosomatik Medizinische Psychologie</i> 2016;66(1):31-8.      | Not written in English                                                        |
| Lohr KN, Carey TS. Assessing "best evidence": issues in grading the quality of studies for systematic reviews. <i>The Joint Commission Journal on Quality Improvement</i> 1999;25(9):470-9.                                                                 | Guidance on using existing tools                                              |
| Lonjon G, Porcher R, Ergina P, Fouet M, Boutron I. Potential Pitfalls of Reporting and Bias in Observational Studies With Propensity Score Analysis Assessing a Surgical Procedure: A Methodological Systematic Review. <i>Ann Surg</i> 2016:no pagination. | Paper does not report on a structured tool                                    |
| Lundh A, Gotzsche PC. Recommendations by Cochrane Review Groups for assessment of the risk of bias in studies. <i>BMC Med Res Methodol</i> 2008;8:22.                                                                                                       | Guidance on using existing tools                                              |

| Reference                                                                                                                                                                                                                                   | Reason for exclusion                                               |
|---------------------------------------------------------------------------------------------------------------------------------------------------------------------------------------------------------------------------------------------|--------------------------------------------------------------------|
| Lynch HN, Goodman JE, Tabony JA, Rhomberg LR. Systematic comparison of study quality criteria. <i>Regul Toxicol Pharmacol</i> 2016;76:187-98.                                                                                               | Systematic review of tools                                         |
| Macleod MR, Lawson McLean A, Kyriakopoulou A, Serghiou S, de Wilde A, Sherratt N, et al. Risk of Bias in Reports of In Vivo Research: A Focus for Improvement. <i>PLoS Biology</i> 2015;13(10):e1002273.                                    | Tool does not assess reporting bias                                |
| Maher CG, Sherrington C, Herbert RD, Moseley AM, Elkins M. Reliability of the PEDro scale for rating quality of randomized controlled trials. <i>Phys Ther</i> 2003;83(8):713-21.                                                           | Tool does not assess reporting bias                                |
| Malmivaara A. Methodological considerations of the GRADE method. <i>Annals of Medicine</i> 2015;47(1):1-5.                                                                                                                                  | Guidance on using existing tools                                   |
| Marshall IJ, Kuiper J, Wallace BC. RobotReviewer: evaluation of a system for automatically assessing bias in clinical trials. <i>Journal of the American Medical Informatics Association</i> 2016;23(1):193-201.                            | Model to semi-automate Cochrane risk of bias tool                  |
| McDonagh MS, Peterson K, Balshem H, Helfand M. US Food and Drug Administration documents can provide unpublished evidence relevant to systematic reviews. <i>Journal of Clinical Epidemiology</i> 2013;66(10):1071-81.                      | Paper does not report on a structured tool                         |
| McShane BB, Bockenholt U, Hansen KT. Adjusting for Publication Bias in Meta-Analysis: An Evaluation of Selection Methods and Some Cautionary Notes. <i>Perspectives on Psychological Science</i> 2016;11(5):730-49.                         | Describes statistical methods only                                 |
| Millard LAC, Flach PA, Higgins JPT. Machine learning to assist risk-of-bias assessments in systematic reviews. <i>International Journal of Epidemiology</i> 2016;45(1):266-77.                                                              | Model to semi-automate Cochrane risk of bias tool                  |
| Moher D, Jadad AR, Nichol G, Penman M, Tugwell P, Walsh S. Assessing the quality of randomized controlled trials: an annotated bibliography of scales and checklists. <i>Controlled Clinical Trials</i> 1995;16(1):62-73.                   | Systematic review of tools                                         |
| Moons KGM, de Groot JAH, Bouwmeester W, Vergouwe Y, Mallett S, Altman DG, et al. Critical Appraisal and Data Extraction for Systematic Reviews of Prediction Modelling Studies: The CHARMS Checklist. <i>PLoS Med</i> 2014;11(10):e1001744. | Refers to a tool to assess quality of published systematic reviews |
| Moyer A, Finney JW. Rating methodological quality: toward improved assessment and investigation. <i>Accountability in Research</i> 2005;12(4):299-313.                                                                                      | Guidance on using existing tools                                   |
| Mueller KF, Briel M, Strech D, Meerpohl JJ, Lang B, Motschall E, et al. Dissemination bias in systematic reviews of animal research: a systematic review. <i>PloS One</i> 2014;9(12):e116016.                                               | Paper does not report on a structured tool                         |
| Mueller KF, Meerpohl JJ, Briel M, Antes G, von Elm E, Lang B, et al. Detecting, quantifying and adjusting for publication bias in meta-analyses: protocol of a systematic review on methods. <i>Systematic Reviews</i> 2013;2:60.           | Describes statistical methods only                                 |

| Reference                                                                                                                                                                                                                                                           | Reason for exclusion                                                          |
|---------------------------------------------------------------------------------------------------------------------------------------------------------------------------------------------------------------------------------------------------------------------|-------------------------------------------------------------------------------|
| Mueller KF, Meerpohl JJ, Briel M, Antes G, von Elm E, Lang B, et al. Methods for detecting, quantifying, and adjusting for dissemination bias in meta-analysis are described. <i>J Clin Epidemiol</i> 2016;80:25-33.                                                | Describes statistical methods only                                            |
| Nakagawa S, Noble DWA, Senior AM, Lagisz M. Meta-evaluation of meta-analysis: ten appraisal questions for biologists. <i>BMC Biology</i> 2017;15(1):18.                                                                                                             | Refers to a tool to assess quality of published systematic reviews            |
| Nolting A, Perleth M, Langer G, Meerpohl JJ, Gartlehner G, Kaminski-Hartenthaler A, et al. [GRADE guidelines: 5. Rating the quality of evidence: publication bias]. <i>Zeitschrift fur Evidenz, Fortbildung und Qualitat im Gesundheitswesen</i> 2012;106(9):670-6. | Not written in English                                                        |
| Norris SL, Moher D, Reeves BC, Shea B, Loke Y, Garner S, et al. Issues relating to selective reporting when including non-randomized studies in systematic reviews on the effects of healthcare interventions. <i>Res Synth Methods</i> 2013;4(1):36-47.            | Guidance on using existing tools                                              |
| Nurmatov UB, Xiong T, Kroes MA. Evaluation of quality assessment tools for non-randomised controlled trials assessing surgical interventions: A systematic review of systematic reviews. <i>Value in Health</i> 2015;18(7):A722.                                    | Systematic review of tools                                                    |
| Odierna DH, Forsyth SR, White J, Bero LA. The cycle of bias in health research: a framework and toolbox for critical appraisal training. <i>Accountability in Research</i> 2013;20(2):127-41.                                                                       | Paper does not report on a structured tool                                    |
| Palma Perez S, Delgado Rodriguez M. [Practical considerations on detection of publication bias]. <i>Gac Sanit</i> 2006;20(Suppl 3):10-6.                                                                                                                            | Not written in English                                                        |
| Pearson M, Peters J. Outcome reporting bias in evaluations of public health interventions: evidence of impact and the potential role of a study register. <i>Journal of Epidemiology and Community Health</i> 2012;66(4):286-9.                                     | Evaluation of use of tool in practice, but no measurement properties assessed |
| Petticrew M, Egan M, Thomson H, Hamilton V, Kunkler R, Roberts H. Publication bias in qualitative research: what becomes of qualitative research presented at conferences? <i>Journal of Epidemiology and Community Health</i> 2008;62(6):552-4.                    | Paper does not report on a structured tool                                    |
| Pigott TD, Valentine JC, Polanin JR, Williams RT, Canada DD. Outcome-Reporting Bias in Education Research. <i>Educational Researcher</i> 2013;42(8):424-32.                                                                                                         | Paper does not report on a structured tool                                    |
| Pirracchio R, Resche-Rigon M, Chevret S, Journois D. Do simple screening statistical tools help to detect reporting bias? <i>Annals of Intensive Care</i> 2013;3(1):29.                                                                                             | Describes statistical methods only                                            |
| Quigley JM, Thompson J, Halfpenny N, Scott DA. Critical appraisal of non-randomized controlled trials-a review of recommended and commonly used tools. <i>Value in Health</i> 2014;17(3):A203.                                                                      | Systematic review of tools                                                    |
| Quigley JM, Thompson JC, Halfpenny NJ, Scott DA. Critical appraisal of real world evidence-a review of recommended and commonly used tools. <i>Value in Health</i> 2015;18(7):A684.                                                                                 | Systematic review of tools                                                    |

| Reference                                                                                                                                                                                                                                                                                       | Reason for exclusion                                                          |
|-------------------------------------------------------------------------------------------------------------------------------------------------------------------------------------------------------------------------------------------------------------------------------------------------|-------------------------------------------------------------------------------|
| Quintana DS. From pre-registration to publication: A non-technical primer for conducting a meta-analysis to synthesize correlational data. <i>Front Psychol</i> 2015;6:1549.                                                                                                                    | Paper does not report on a structured tool                                    |
| Rangel SJ, Kelsey J, Colby CE, Anderson J, Moss RL. Development of a quality assessment scale for retrospective clinical studies in pediatric surgery. <i>Journal of Pediatric Surgery</i> 2003;38(3):390-6.                                                                                    | Tool does not assess reporting bias                                           |
| Rosella L, Bowman C, Pach B, Morgan S, Fitzpatrick T, Goel V. The development and validation of a meta-tool for quality appraisal of public health evidence: Meta Quality Appraisal Tool (MetaQAT). <i>Public Health</i> 2016 Jul;136:57-65.                                                    | Tool does not assess reporting bias                                           |
| Sanderson S, Tatt ID, Higgins JPT. Tools for assessing quality and susceptibility to bias in observational studies in epidemiology: a systematic review and annotated bibliography. <i>International Journal of Epidemiology</i> 2007;36(3):666-76.                                             | Systematic review of tools                                                    |
| Santaguida PL, Riley CM, Matchar DB. Chapter 5: Assessing risk of bias as a domain of quality in medical test studies. <i>Journal of General Internal Medicine</i> 2012;27(Suppl 1):S33-S8.                                                                                                     | Guidance on using existing tools                                              |
| Savovic J, Weeks L, Sterne JA, Turner L, Altman DG, Moher D, et al. Evaluation of the Cochrane Collaboration's tool for assessing the risk of bias in randomized trials: focus groups, online survey, proposed recommendations and their implementation. <i>Syst Rev</i> 2014;3:37.             | Evaluation of use of tool in practice, but no measurement properties assessed |
| Seehra J, Pandis N, Koletsis D, Fleming PS. Use of quality assessment tools in systematic reviews was varied and inconsistent. <i>J Clin Epidemiol</i> 2016;69:179-84.e5.                                                                                                                       | Audit of tools used in systematic reviews                                     |
| Shamliyan T, Kane RL, Dickinson S. A systematic review of tools used to assess the quality of observational studies that examine incidence or prevalence and risk factors for diseases. <i>Journal of Clinical Epidemiology</i> 2010;63(10):1061-70.                                            | Systematic review of tools                                                    |
| Shamliyan TA, Kane RL, Ansari MT, Raman G, Berkman ND, Grant M, et al. Development quality criteria to evaluate nontherapeutic studies of incidence, prevalence, or risk factors of chronic diseases: pilot study of new checklists. <i>Journal of Clinical Epidemiology</i> 2011;64(6):637-57. | Tool does not assess reporting bias                                           |
| Shea BJ, Grimshaw JM, Wells GA, Boers M, Andersson N, Hamel C, et al. Development of AMSTAR: a measurement tool to assess the methodological quality of systematic reviews. <i>BMC Med Res Methodol</i> 2007;7:10.                                                                              | Refers to a tool to assess quality of published systematic reviews            |
| Shea BJ, Hamel C, Wells GA, Bouter LM, Kristjansson E, Grimshaw J, et al. AMSTAR is a reliable and valid measurement tool to assess the methodological quality of systematic reviews. <i>Journal of Clinical Epidemiology</i> 2009;62(10):1013-20.                                              | Refers to a tool to assess quality of published systematic reviews            |
| Shuang M, Zhao C, Zhang L, Shang HC. Using SYRCLE tools to evaluate the methodological quality of animal experiments of stroke in China. <i>Chinese Journal of Evidence-Based Medicine</i> 2016;16(5):592-7.                                                                                    | Not written in English                                                        |

| Reference                                                                                                                                                                                                                                                                                                                                                                         | Reason for exclusion                       |
|-----------------------------------------------------------------------------------------------------------------------------------------------------------------------------------------------------------------------------------------------------------------------------------------------------------------------------------------------------------------------------------|--------------------------------------------|
| Singh S, Khosla S. Suboptimal choice of methodology for meta-analysis and publication bias assessment. <i>The American Journal of Cardiology</i> 2015;115(12):1782-3.                                                                                                                                                                                                             | Describes statistical methods only         |
| Smyth RM, Kirkham JJ, Jacoby A, Altman DG, Gamble C, Williamson PR. Frequency and reasons for outcome reporting bias in clinical trials: interviews with trialists. <i>BMJ</i> 2011;342:c7153.                                                                                                                                                                                    | Paper does not report on a structured tool |
| Sohani ZN, Meyre D, de Souza RJ, Joseph PG, Gandhi M, Dennis BB, et al. Assessing the quality of published genetic association studies in meta-analyses: the quality of genetic studies (Q-Genie) tool. <i>BMC Genet</i> 2015;16:50.                                                                                                                                              | Tool does not assess reporting bias        |
| Song F, Parekh S, Hooper L, Loke YK, Ryder J, Sutton AJ, et al. Dissemination and publication of research findings: an updated review of related biases. <i>Health Technology Assessment (Winchester, England)</i> 2010;14(8):iii-193.                                                                                                                                            | Paper does not report on a structured tool |
| Spooner CH, Pickard AS, Menon D. Edmonton Quality Assessment Tool for Drug Utilization Reviews: EQUATDUR-2: the development of a scale to assess the methodological quality of a drug utilization review. <i>Medical Care</i> 2000;38(9):948-58.                                                                                                                                  | Tool does not assess reporting bias        |
| Tate RL, Perdices M, Rosenkoetter U, Wakim D, Godbee K, Togher L, et al. Revision of a method quality rating scale for single-case experimental designs and n-of-1 trials: the 15-item Risk of Bias in N-of-1 Trials (RoBiNT) Scale. <i>Neuropsychological Rehabilitation</i> 2013;23(5):619-38.                                                                                  | Tool does not assess reporting bias        |
| Viswanathan M, Ansari MT, Berkman ND, Chang S, Hartling L, McPheeters M, et al. AHRQ Methods for Effective Health Care Assessing the Risk of Bias of Individual Studies in Systematic Reviews of Health Care Interventions. <i>Methods Guide for Effectiveness and Comparative Effectiveness Reviews</i> . Rockville (MD): Agency for Healthcare Research and Quality (US); 2012. | Guidance on using existing tools           |
| Voss PH, Rehfues EA. Quality appraisal in systematic reviews of public health interventions: an empirical study on the impact of choice of tool on meta-analysis. <i>Journal of Epidemiology and Community Health</i> 2013;67(1):98-104.                                                                                                                                          | Evaluation of existing tools               |
| Wells GA, Shea B, O'Connell D, Peterson J, Welch V, Losos M, et al. The Newcastle-Ottawa Scale (NOS) for assessing the quality of nonrandomised studies in meta-analyses. 2008. <a href="http://www.ohri.ca/programs/clinical_epidemiology/oxford.asp">http://www.ohri.ca/programs/clinical_epidemiology/oxford.asp</a> (accessed 7/03/2017).                                     | Tool does not assess reporting bias        |
| Whiting P, Rutjes AWS, Dinnes J, Reitsma JB, Bossuyt PMM, Kleijnen J. A systematic review finds that diagnostic reviews fail to incorporate quality despite available tools. <i>Journal of Clinical Epidemiology</i> 2005;58(1):1-12.                                                                                                                                             | Systematic review of tools                 |
| Whiting P, Rutjes AWS, Reitsma JB, Bossuyt PMM, Kleijnen J. The development of QUADAS: a tool for the quality assessment of                                                                                                                                                                                                                                                       | Tool does not assess reporting bias        |

| Reference                                                                                                                                                                                                                                                            | Reason for exclusion                                               |
|----------------------------------------------------------------------------------------------------------------------------------------------------------------------------------------------------------------------------------------------------------------------|--------------------------------------------------------------------|
| studies of diagnostic accuracy included in systematic reviews. BMC Med Res Methodol 2003;3:25.                                                                                                                                                                       |                                                                    |
| Whiting PF, Rutjes AWS, Westwood ME, Mallett S, Deeks JJ, Reitsma JB, et al. QUADAS-2: a revised tool for the quality assessment of diagnostic accuracy studies. Annals of Internal Medicine 2011;155(8):529-36.                                                     | Tool does not assess reporting bias                                |
| Wiert L, Kolaski K, Vogtle LK, Butler C, Romeiser Logan L, Hickman R, et al. Inter-rater reliability and concurrent validity of the AACPDM study design and quality rating system for conducting systematic reviews (group design). Dev Med Child Neurol 2011;53:74. | Refers to a tool to assess quality of published systematic reviews |
