# Supplementary material for: Tools for assessing risk of reporting biases in studies and syntheses of studies: a systematic review
Source: PubMed Central journal article supplement — BMJ Open. 2018 Mar 14;8(3):e019703. doi: 10.1136/bmjopen-2017-019703 (PMC5857645; doi:10.1136/bmjopen-2017-019703), 2018-03-14
Supplement: bmjopen-2017-019703supp003.pdf [file bmjopen-2017-019703supp003.pdf]

**Table S3. General characteristics of included tools**

| <b>Article ID</b>         | <b>Tool</b>                                            | <b>Type of tool</b> | <b>Scope of tool</b>     | <b>Types of reporting bias</b>                                                   | <b>Types of study designs</b> | <b>Level of assessment</b>         | <b>Methods used to develop tool</b>       | <b>Guidance available</b>                 | <b>Measurement properties evaluated</b> |
|---------------------------|--------------------------------------------------------|---------------------|--------------------------|----------------------------------------------------------------------------------|-------------------------------|------------------------------------|-------------------------------------------|-------------------------------------------|-----------------------------------------|
| Balshem 2013 <sup>1</sup> | AHRQ outcome and analysis reporting bias framework     | Domain-based        | Reporting bias only      | Bias due to selective non-reporting and bias in selection of the reported result | Randomized trials             | Specific outcome/result in a study | Expert consensus (via email)              | Brief annotation per item/response option | No                                      |
| Berkman 2013 <sup>2</sup> | AHRQ tool for evaluating the risk of reporting bias    | Domain-based        | Reporting bias only      | Bias due to selective publication and bias due to selective non-reporting        | Systematic reviews            | Specific synthesis of studies      | Not stated                                | Brief annotation per item/response option | No                                      |
| Downes 2016 <sup>3</sup>  | AXIS tool (Appraisal tool for Cross-Sectional Studies) | Checklist           | Multiple sources of bias | Bias due to selective non-reporting                                              | Cross-sectional studies       | Whole study                        | Literature review, piloting, Delphi study | None                                      | No                                      |
| Downs 1998 <sup>4</sup>   | Downs-Black tool                                       | Scale               | Multiple sources of bias | Bias in selection of the                                                         | Randomized trials and non-    | Whole study                        | Literature review, piloting,              | Brief annotation per                      | Yes                                     |

| Article ID                    | Tool                                             | Type of tool | Scope of tool            | Types of reporting bias                                                   | Types of study designs              | Level of assessment           | Methods used to develop tool                                                                   | Guidance available                        | Measurement properties evaluated |
|-------------------------------|--------------------------------------------------|--------------|--------------------------|---------------------------------------------------------------------------|-------------------------------------|-------------------------------|------------------------------------------------------------------------------------------------|-------------------------------------------|----------------------------------|
|                               |                                                  |              |                          | reported result                                                           | randomized studies of interventions |                               | psychometric testing                                                                           | item/response option                      |                                  |
| Guyatt 2011 <sup>5-9</sup>    | GRADE                                            | Domain-based | Multiple sources of bias | Bias due to selective publication and bias due to selective non-reporting | Systematic reviews                  | Specific synthesis of studies | Literature review, expert consensus (face-to-face and email), user testing                     | Detailed guidance manual                  | Yes                              |
| Hayden 2013 <sup>10</sup>     | QUIPS (Quality In Prognosis Studies) tool        | Domain-based | Multiple sources of bias | Bias due to selective non-reporting                                       | Prognosis studies                   | Whole study                   | Modified Delphi approach, nominal group technique at facilitated discussion workshop; piloting | Brief annotation per item/response option | Yes                              |
| Higgins 2008 <sup>11-13</sup> | Cochrane risk of bias tool for randomized trials | Domain-based | Multiple sources of bias | Bias due to selective non-reporting and bias in selection of the          | Randomized trials                   | Whole study                   | Literature review, informal consensus at facilitated meeting, piloting, focus groups and       | Detailed guidance manual                  | Yes                              |

| Article ID                    | Tool                                                                               | Type of tool | Scope of tool            | Types of reporting bias                                                          | Types of study designs                  | Level of assessment                | Methods used to develop tool                                           | Guidance available                        | Measurement properties evaluated |
|-------------------------------|------------------------------------------------------------------------------------|--------------|--------------------------|----------------------------------------------------------------------------------|-----------------------------------------|------------------------------------|------------------------------------------------------------------------|-------------------------------------------|----------------------------------|
|                               |                                                                                    |              |                          | reported result                                                                  |                                         |                                    | surveys, followed by consensus meeting                                 |                                           |                                  |
| Higgins 2016 <sup>14 15</sup> | RoB 2.0 (revised tool for assessing risk of bias in randomized trials)             | Domain-based | Multiple sources of bias | Bias in selection of the reported result                                         | Randomized trials                       | Specific outcome/result in a study | Literature review, informal consensus at facilitated meeting, piloting | Detailed guidance manual                  | No                               |
| Hoojimans 2014 <sup>16</sup>  | SYRCLE's RoB tool (SYstematic Review Centre for Laboratory animal Experimentation) | Domain-based | Multiple sources of bias | Bias due to selective non-reporting and bias in selection of the reported result | Animal studies                          | Whole study                        | Adaptation of existing tool, literature review                         | Brief annotation per item/response option | No                               |
| Kim 2013 <sup>17</sup>        | RoBANS (Risk of Bias Assessment Tool for Nonrandomized Studies)                    | Domain-based | Multiple sources of bias | Bias due to selective non-reporting and bias in selection of the                 | Non-randomized studies of interventions | Whole study                        | Literature review, psychometric testing                                | Brief annotation per item/response option | Yes                              |

| Article ID                    | Tool                                                                                  | Type of tool | Scope of tool            | Types of reporting bias                                                   | Types of study designs | Level of assessment                | Methods used to develop tool                                    | Guidance available                        | Measurement properties evaluated |
|-------------------------------|---------------------------------------------------------------------------------------|--------------|--------------------------|---------------------------------------------------------------------------|------------------------|------------------------------------|-----------------------------------------------------------------|-------------------------------------------|----------------------------------|
|                               |                                                                                       |              |                          | reported result                                                           |                        |                                    |                                                                 |                                           |                                  |
| Kirkham 2010 <sup>18,19</sup> | ORBIT-I (Outcome Reporting Bias In Trials) classification system for benefit outcomes | Domain-based | Reporting bias only      | Bias due to selective non-reporting                                       | Randomized trials      | Specific outcome/result in a study | Iteratively developed as part of a methodological study         | Worked example for each response option   | Yes                              |
| Meader 2014 <sup>20,21</sup>  | SAQAT (Semi-Automated Quality Assessment Tool)                                        | Domain-based | Multiple sources of bias | Bias due to selective publication and bias due to selective non-reporting | Systematic reviews     | Specific synthesis of studies      | Development of logic model based on GRADE articles and piloting | None                                      | Yes                              |
| Reid 2015 <sup>22</sup>       | Selective reporting bias algorithm                                                    | Domain-based | Reporting bias only      | Bias due to selective non-reporting and bias in selection of the          | Randomized trials      | Whole study                        | Not stated                                                      | Brief annotation per item/response option | No                               |

| Article ID                    | Tool                                                                                | Type of tool | Scope of tool            | Types of reporting bias                                                   | Types of study designs                                        | Level of assessment                | Methods used to develop tool                            | Guidance available                           | Measurement properties evaluated |
|-------------------------------|-------------------------------------------------------------------------------------|--------------|--------------------------|---------------------------------------------------------------------------|---------------------------------------------------------------|------------------------------------|---------------------------------------------------------|----------------------------------------------|----------------------------------|
|                               |                                                                                     |              |                          | reported result                                                           |                                                               |                                    |                                                         |                                              |                                  |
| Saini 2014 <sup>23</sup>      | ORBIT-II (Outcome Reporting Bias In Trials) classification system for harm outcomes | Domain-based | Reporting bias only      | Bias due to selective non-reporting                                       | Randomized trials and non-randomized studies of interventions | Specific outcome/result in a study | Iteratively developed as part of a methodological study | Worked example for each response option      | No                               |
| Salanti 2014 <sup>24 25</sup> | Framework for evaluating the quality of evidence from a network meta-analysis       | Domain-based | Multiple sources of bias | Bias due to selective publication and bias due to selective non-reporting | Network meta-analyses                                         | Specific synthesis of studies      | Adaptation of existing tool                             | Detailed annotation per item/response option | No                               |
| Sterne 2016 <sup>26</sup>     | ROBINS-I (Risk Of Bias In Non-randomized Studies of Interventions) tool             | Domain-based | Multiple sources of bias | Bias in selection of the reported result                                  | Non-randomized studies of interventions                       | Specific outcome/result in a study | Expert consensus meetings (face-to-face), piloting      | Detailed guidance manual                     | Yes                              |

| Article ID                     | Tool                                                                                                               | Type of tool | Scope of tool            | Types of reporting bias             | Types of study designs                               | Level of assessment | Methods used to develop tool                                                             | Guidance available                        | Measurement properties evaluated |
|--------------------------------|--------------------------------------------------------------------------------------------------------------------|--------------|--------------------------|-------------------------------------|------------------------------------------------------|---------------------|------------------------------------------------------------------------------------------|-------------------------------------------|----------------------------------|
| Viswanathan 2012 <sup>27</sup> | RTI Item Bank for Assessment of Risk of Bias and Precision for Observational Studies of Interventions or Exposures | Domain-based | Multiple sources of bias | Bias due to selective non-reporting | Non-randomized studies of interventions or exposures | Whole study         | Literature review, expert consensus (via email), cognitive testing, psychometric testing | Brief annotation per item/response option | No                               |
| Viswanathan 2013 <sup>28</sup> | RTI Item Bank for Assessing Risk of Bias and Confounding for Observational Studies of Interventions or Exposures   | Domain-based | Multiple sources of bias | Bias due to selective non-reporting | Non-randomized studies of interventions or exposures | Whole study         | Literature review, expert consensus (via email)                                          | Brief annotation per item/response option | No                               |

## References

1. Balshem H, Stevens A, Ansari M, et al. Finding grey literature evidence and assessing for outcome and analysis reporting biases when comparing medical interventions: AHRQ and the Effective Health Care Program. (Prepared by the Oregon Health and Science University and the University of Ottawa Evidence-based Practice Centers under Contract Nos. 290-2007-10057-I and 290-2007-10059-I.) AHRQ Publication No. 13(14)-EHC096-EF. Rockville, MD: Agency for Healthcare Research and Quality. November 2013.  
[www.effectivehealthcare.ahrq.gov/reports/final.cfm](http://www.effectivehealthcare.ahrq.gov/reports/final.cfm).
2. Berkman ND, Lohr KN, Ansari M, et al. Chapter 15 Appendix A: A Tool for Evaluating the Risk of Reporting Bias (in Chapter 15: Grading the Strength of a Body of Evidence When Assessing Health Care Interventions for the Effective Health Care Program of the Agency for Healthcare Research and Quality: An Update). Methods Guide for Comparative Effectiveness Reviews (Prepared by the RTI-UNC Evidence-based Practice Center under Contract No. 290-2007-10056-I). AHRQ Publication No. 13(14)-EHC130-EF. Rockville, MD: Agency for Healthcare Research and Quality. November 2013.  
[www.effectivehealthcare.ahrq.gov/reports/final.cfm](http://www.effectivehealthcare.ahrq.gov/reports/final.cfm)
3. Downes MJ, Brennan ML, Williams HC, et al. Development of a critical appraisal tool to assess the quality of cross-sectional studies (AXIS). *BMJ open* 2016;6:e011458.
4. Downs SH, Black N. The feasibility of creating a checklist for the assessment of the methodological quality both of randomised and non-randomised studies of health care interventions. *J Epidemiol Community Health* 1998;52(6):377-84.
5. Guyatt GH, Oxman AD, Vist GE, et al. GRADE: an emerging consensus on rating quality of evidence and strength of recommendations. *BMJ* 2008;336(7650):924-6.
6. Guyatt GH, Oxman AD, Montori V, et al. GRADE guidelines: 5. Rating the quality of evidence—publication bias. *J Clin Epidemiol* 2011;64(12):1277-82.

7. Guyatt GH, Oxman AD, Vist G, et al. GRADE guidelines: 4. Rating the quality of evidence--study limitations (risk of bias). *J Clin Epidemiol* 2011;64(4):407-15.
8. Schünemann H, Brożek J, Guyatt G, et al. Handbook for grading the quality of evidence and the strength of recommendations using the GRADE approach. [Updated October 2013]. Available from <http://gdt.guidelinedevelopment.org/app/handbook/handbook.html>.
9. Santesso N, Carrasco-Labra A, Langendam M, et al. Improving GRADE evidence tables part 3: detailed guidance for explanatory footnotes supports creating and understanding GRADE certainty in the evidence judgments. *J Clin Epidemiol* 2016
10. Hayden JA, van der Windt DA, Cartwright JL, et al. Assessing bias in studies of prognostic factors. *Ann Intern Med* 2013;158(4):280-6.
11. Higgins JPT, Altman DG, Sterne JAC. Chapter 8: Assessing risk of bias in included studies. In: Higgins JPT, Green S, eds. *Cochrane Handbook for Systematic Reviews of Interventions*. Chichester (UK): John Wiley & Sons 2008:187-241.
12. Higgins JPT, Altman DG, Sterne JAC. Chapter 8: Assessing risk of bias in included studies. In: Higgins JPT, Green S, eds. *Cochrane Handbook for Systematic Reviews of Interventions* Version 5.1.0 [updated March 2011]. The Cochrane Collaboration, 2011. Available from <http://handbook.cochrane.org/>.
13. Higgins JPT, Altman DG, Gøtzsche PC, et al. The Cochrane Collaboration's tool for assessing risk of bias in randomised trials. *BMJ* 2011;343:d5928.
14. Higgins JPT, Savović J, Page MJ, et al. Revised Cochrane risk of bias tool for randomized trials (RoB 2.0), Version 20 October 2016. Available from <http://www.bristol.ac.uk/population-health-sciences/centres/cresyda/barr/riskofbias/rob2-0/> [accessed 19 September 2017].
15. Higgins JPT, Sterne JAC, Savović J, et al. A revised tool for assessing risk of bias in randomized trials. *Cochrane Methods Cochrane Database of Systematic Reviews* 2016;10(Suppl 1):29-31.
16. Hooijmans CR, Rovers MM, de Vries RBM, et al. SYRCLE's risk of bias tool for animal studies. *BMC Med Res Methodol* 2014;14:43.

17. Kim SY, Park JE, Lee YJ, et al. Testing a tool for assessing the risk of bias for nonrandomized studies showed moderate reliability and promising validity. *J Clin Epidemiol* 2013;66(4):408-14.
18. Kirkham JJ, Dwan KM, Altman DG, et al. The impact of outcome reporting bias in randomised controlled trials on a cohort of systematic reviews. *BMJ* 2010;340:c365.
19. Dwan K, Gamble C, Kolamunnage-Dona R, et al. Assessing the potential for outcome reporting bias in a review: a tutorial. *Trials* 2010;11:52.
20. Meader N, King K, Llewellyn A, et al. A checklist designed to aid consistency and reproducibility of GRADE assessments: development and pilot validation. *Systematic reviews* 2014;3(1):82.
21. Stewart GB, Higgins JP, Schunemann H, et al. The use of Bayesian networks to assess the quality of evidence from research synthesis: 1. *PLoS One* 2015;10(3):e0114497.
22. Reid EK, Tejani AM, Huan LN, et al. Managing the incidence of selective reporting bias: a survey of Cochrane review groups. *Systematic reviews* 2015;4:85.
23. Saini P, Loke YK, Gamble C, et al. Selective reporting bias of harm outcomes within studies: findings from a cohort of systematic reviews. *BMJ* 2014;349:g6501.
24. Salanti G, Giovane CD, Chaimani A, et al. Evaluating the quality of evidence from a network meta-analysis. *PLoS One* 2014;9(7):e99682.
25. Higgins JP, Del Giovane C, Chaimani A, et al. Evaluating the quality of evidence from a network meta-analysis. *Value Health* 2014;17(7):A324.
26. Sterne JA, Hernan MA, Reeves BC, et al. ROBINS-I: a tool for assessing risk of bias in non-randomised studies of interventions. *BMJ* 2016;355:i4919.
27. Viswanathan M, Berkman ND. Development of the RTI item bank on risk of bias and precision of observational studies. *J Clin Epidemiol* 2012;65(2):163-78.
28. Viswanathan M, Berkman ND, Dryden DM, et al. AHRQ Methods for Effective Health Care. Assessing Risk of Bias and Confounding in Observational Studies of Interventions or

Exposures: Further Development of the RTI Item Bank. Rockville (MD): Agency for  
Healthcare Research and Quality (US) 2013.
